# Supplementary material for: The HIV Care Cascade from HIV diagnosis to viral suppression in sub-Saharan Africa: a systematic review and meta-regression analysis protocol
Source: PubMed Central journal article supplement (PMC5574086; doi:10.1186/s13643-017-0562-z), 2017-08-25
Supplement: 13643_2017_562_MOESM4_ESM.pdf [file 13643_2017_562_MOESM4_ESM.pdf]

|                                                                                                                                                                                                                                                                                                                                            |                                                                                                                                                                                  |                                       |                                                    |
|--------------------------------------------------------------------------------------------------------------------------------------------------------------------------------------------------------------------------------------------------------------------------------------------------------------------------------------------|----------------------------------------------------------------------------------------------------------------------------------------------------------------------------------|---------------------------------------|----------------------------------------------------|
| <b>Study ID-Number:</b>                                                                                                                                                                                                                                                                                                                    | <b>[Study-ID number: Use the code from the EXCEL-Sheet]</b>                                                                                                                      |                                       |                                                    |
| <b>STUDY PERIOD</b><br>1. Study period after 01.01. <b>2004</b> (ART initiation after 01.01.2004)                                                                                                                                                                                                                                          | <input type="checkbox"/> YES<br>↓                                                                                                                                                | <input type="checkbox"/> UNCLEAR<br>↓ | <input type="checkbox"/> NO<br>→<br><b>EXCLUDE</b> |
| <b>PARTICIPANTS</b><br>2. HIV-1-infected patients aged 15 years or older (non HIV-2)                                                                                                                                                                                                                                                       | <input type="checkbox"/> YES<br>↓                                                                                                                                                | <input type="checkbox"/> UNCLEAR<br>↓ | <input type="checkbox"/> NO<br>→<br><b>EXCLUDE</b> |
| <b>SETTING</b><br>3. People living with HIV in sub-Saharan AFRICA                                                                                                                                                                                                                                                                          | <input type="checkbox"/> YES<br>↓                                                                                                                                                | <input type="checkbox"/> UNCLEAR<br>↓ | <input type="checkbox"/> NO<br>→<br><b>EXCLUDE</b> |
| 4. "General population"<br>(not a specific sub population is studied such as TB infected, PMTCT, second-line ART only, opportunistic infection, only patients with cancer, drug resistance, malaria, serodiscordant couples)                                                                                                               | <input type="checkbox"/> YES<br>↓                                                                                                                                                | <input type="checkbox"/> UNCLEAR<br>↓ | <input type="checkbox"/> NO<br>→<br><b>EXCLUDE</b> |
| <b>OUTCOMES</b><br>5. At least TWO elements of the following HIV Care Cascade were measured:<br>a. HIV diagnosed <input type="checkbox"/><br>b. Linked to care <input type="checkbox"/><br>c. Engaged or retained in care <input type="checkbox"/><br>d. On ART <input type="checkbox"/><br>e. Virally suppressed <input type="checkbox"/> | <input type="checkbox"/> YES<br>↓                                                                                                                                                | <input type="checkbox"/> UNCLEAR<br>↓ | <input type="checkbox"/> NO<br>→<br><b>EXCLUDE</b> |
| 6. At least ONE element of the following HIV Care Cascade was measured (UNAIDS):<br>a. Proportion HIV diagnosed <input type="checkbox"/><br>b. Proportion on ART <input type="checkbox"/><br>c. Proportion virally suppressed <input type="checkbox"/>                                                                                     | <input type="checkbox"/> YES<br>↓                                                                                                                                                | <input type="checkbox"/> UNCLEAR<br>↓ | <input type="checkbox"/> NO<br>→<br><b>EXCLUDE</b> |
| <b>STUDY DESIGNS</b><br>7. Study design:<br>a. Cohort study <input type="checkbox"/><br>b. Cross sectional study <input type="checkbox"/>                                                                                                                                                                                                  | <input type="checkbox"/> YES<br>↓                                                                                                                                                | <input type="checkbox"/> UNCLEAR<br>↓ | <input type="checkbox"/> NO<br>→<br><b>EXCLUDE</b> |
| <b>FINAL DECISION</b><br>1x EXCLUDE = EXCLUDE<br>1x UNCLEAR = UNCLEAR                                                                                                                                                                                                                                                                      | <input type="checkbox"/> INCLUDE                                                                                                                                                 | <input type="checkbox"/> UNCLEAR      | <input type="checkbox"/> EXCLUDE                   |
| <b>NOTES</b><br><input type="checkbox"/> yes <input type="checkbox"/> no<br><i>*Please do not forgot to add the publication type (journal article, letter, conference paper, or other)</i>                                                                                                                                                 | Publication type:<br><input type="checkbox"/> Journal article <input type="checkbox"/> Editorial/letter <input type="checkbox"/> Conference paper <input type="checkbox"/> Other |                                       |                                                    |
